# Supplementary material for: Phototriggered Production of Reactive Oxygen Species by TIO2 Nanospheres and Rods
Source: Hindawi journal article supplement (doi:10.1155/2012/708519), 2012-01-01
Supplement: f1 [file 708519.f1.doc]

Phototriggered Production of Reactive Oxygen by TiO2 Nanospheres and Rods

Bianca Geiseler, Marko Miljevic, Philipp Müller, Ljiljana Fruk

**Supporting Information**

FigureS1

**Figure S1**: Radial integration of the intensities of Debye pattern (black curve) and fitted curve (blue). The fitted curve is in good agreement with the anatase structure. The low intensity peaks around [101] peak are an artifact due to the carbon support film. The low intensity peaks around a circular region with a diameter of 750 nm was selected for the diffraction experiments.

Figure S2

**Figure S2**: ROS production of three types of bare TiO2 NPs a) and dopamine coated b) using 254 nm light source. Samples are background corrected; fluorescence of the sample kept in dark is subtracted from the fluorescence of the irradiated sample.

Figure S3


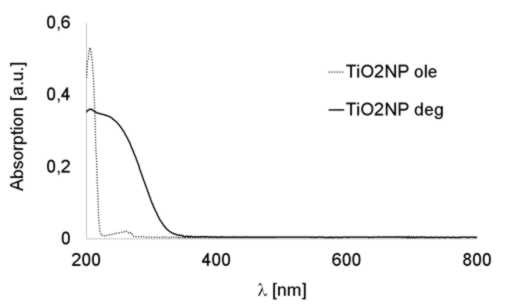


**Figure S3**: UV-Vis spectra of the TiO2 nanoparticles synthesized by diethylene glycol and oleic acid/oleylamine method.
